# Supplementary material
Source: MDPI journal article supplement (https://www.mdpi.com/2673-7159/2/1/7)

## Supplementary Materials

**Figure S1.** qq-plot and standard residuals plots for the model obtained to describe changes in the number of jackdaws from 1994-1997 to 2009-2021 in gypsum cliffs in sectors 1 and 2 (No significant problems were detected)

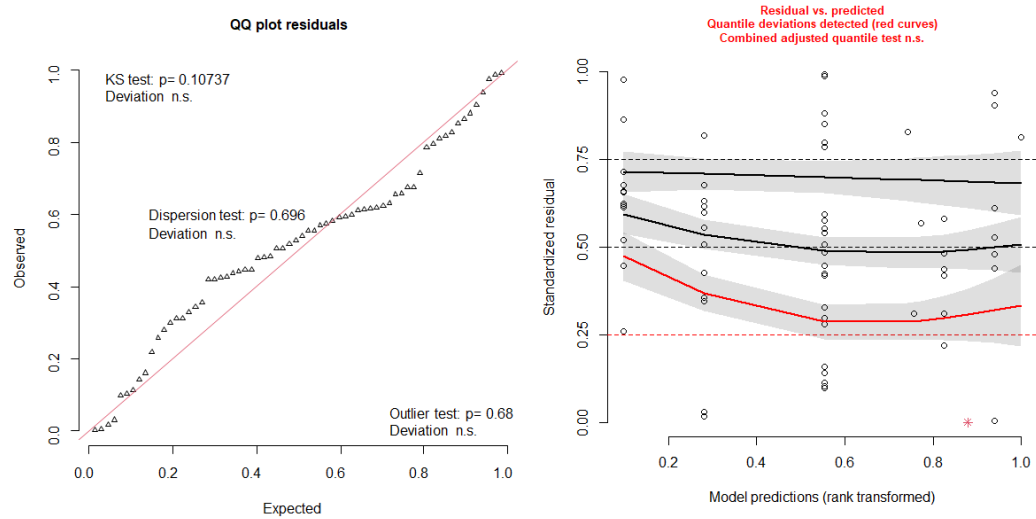

**Figure S2.** qq-plot and standard residuals plots for the model obtained to describe changes in the number of jackdaws from 2009 to 2021 in gypsum cliffs in all monitored sectors (No significant problems were detected).

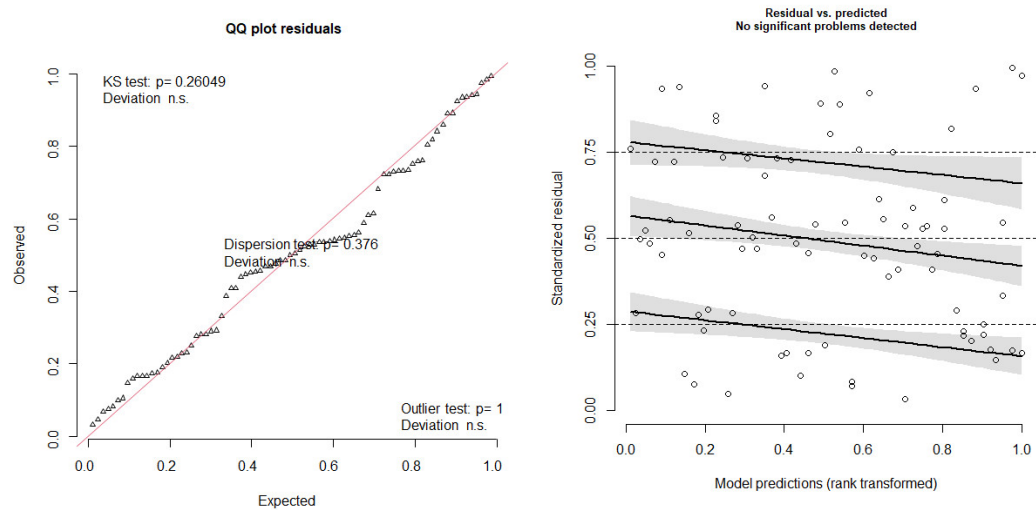

**Figure S3.** qq-plot and standard residuals plots for the model obtained to describe changes in the number of breeding jackdaws (colony size) from 1994-1997 to 2009-2011; the model included a zero-inflation term (No significant problems were detected).

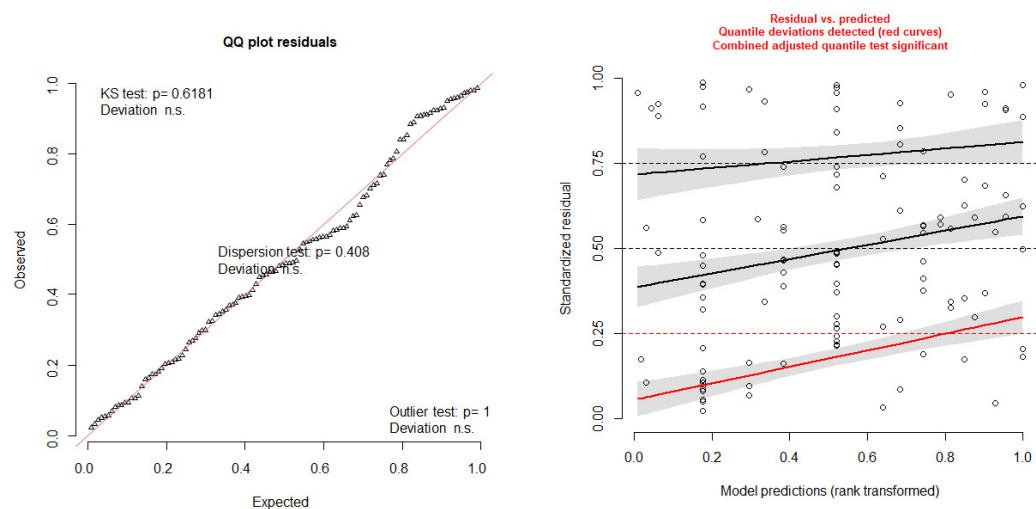

Supplement: s1 [file s1]
